# Supplementary material for: Global stable-isotope tracing metabolomics reveals system-wide metabolic alternations in aging Drosophila
Source: PubMed Central journal article supplement (PMC9209425; doi:10.1038/s41467-022-31268-6), 2022-06-20
Supplement: 41467_2022_31268_MOESM13_ESM.pdf [file 41467_2022_31268_MOESM13_ESM.pdf]

## Reporting Summary

Nature Portfolio wishes to improve the reproducibility of the work that we publish. This form provides structure for consistency and transparency in reporting. For further information on Nature Portfolio policies, see our [Editorial Policies](#) and the [Editorial Policy Checklist](#).

### Statistics

For all statistical analyses, confirm that the following items are present in the figure legend, table legend, main text, or Methods section.

n/a Confirmed

- |                                     |                                     |                                                                                                                                                                                                                                                            |
|-------------------------------------|-------------------------------------|------------------------------------------------------------------------------------------------------------------------------------------------------------------------------------------------------------------------------------------------------------|
| <input type="checkbox"/>            | <input checked="" type="checkbox"/> | The exact sample size ( $n$ ) for each experimental group/condition, given as a discrete number and unit of measurement                                                                                                                                    |
| <input type="checkbox"/>            | <input checked="" type="checkbox"/> | A statement on whether measurements were taken from distinct samples or whether the same sample was measured repeatedly                                                                                                                                    |
| <input type="checkbox"/>            | <input checked="" type="checkbox"/> | The statistical test(s) used AND whether they are one- or two-sided<br><i>Only common tests should be described solely by name; describe more complex techniques in the Methods section.</i>                                                               |
| <input checked="" type="checkbox"/> | <input type="checkbox"/>            | A description of all covariates tested                                                                                                                                                                                                                     |
| <input type="checkbox"/>            | <input checked="" type="checkbox"/> | A description of any assumptions or corrections, such as tests of normality and adjustment for multiple comparisons                                                                                                                                        |
| <input type="checkbox"/>            | <input checked="" type="checkbox"/> | A full description of the statistical parameters including central tendency (e.g. means) or other basic estimates (e.g. regression coefficient) AND variation (e.g. standard deviation) or associated estimates of uncertainty (e.g. confidence intervals) |
| <input type="checkbox"/>            | <input checked="" type="checkbox"/> | For null hypothesis testing, the test statistic (e.g. $F$ , $t$ , $r$ ) with confidence intervals, effect sizes, degrees of freedom and $P$ value noted<br><i>Give <math>P</math> values as exact values whenever suitable.</i>                            |
| <input checked="" type="checkbox"/> | <input type="checkbox"/>            | For Bayesian analysis, information on the choice of priors and Markov chain Monte Carlo settings                                                                                                                                                           |
| <input checked="" type="checkbox"/> | <input type="checkbox"/>            | For hierarchical and complex designs, identification of the appropriate level for tests and full reporting of outcomes                                                                                                                                     |
| <input type="checkbox"/>            | <input checked="" type="checkbox"/> | Estimates of effect sizes (e.g. Cohen's $d$ , Pearson's $r$ ), indicating how they were calculated                                                                                                                                                         |

*Our web collection on [statistics for biologists](#) contains articles on many of the points above.*

### Software and code

Policy information about [availability of computer code](#)

|                 |                                                                                                                                                                                                                                                                                                                                                                                                                                                                                                                                                                                                                                                                                                                                                                                       |
|-----------------|---------------------------------------------------------------------------------------------------------------------------------------------------------------------------------------------------------------------------------------------------------------------------------------------------------------------------------------------------------------------------------------------------------------------------------------------------------------------------------------------------------------------------------------------------------------------------------------------------------------------------------------------------------------------------------------------------------------------------------------------------------------------------------------|
| Data collection | These tool were used in data collection: Analyst TF Software (version 1.7.1, Sciex, USA), Xcalibur (Version 4.4.16.14, Thermo Fisher Scientific, USA)                                                                                                                                                                                                                                                                                                                                                                                                                                                                                                                                                                                                                                 |
| Data analysis   | The source code of MetTracer is provided on GitHub [ <a href="https://github.com/ZhuMetLab/MetTracer">https://github.com/ZhuMetLab/MetTracer</a> ] and Zenodo [ <a href="https://doi.org/10.5281/zenodo.6575308">https://doi.org/10.5281/zenodo.6575308</a> ]. A detailed description of open and vendor software in this study has been included in the Methods. R package "X13CMS" (version 1.4); R package "geoRge" (version 1.0); GUI software of EI-MAVEN (version 0.11.0); Skyline software (version 20.2.0.286); "AccuCor" (version 0.2.4); "MSFinder" (version 3.24); "xcms" (version 1.46.0 for Triple TOF dataset and version 3.12.0 for Orbitrap Exploris 480 dataset); MetDNA (version 1.2.2); "enviPat" (version 2.4); circlize (version 0.2.10); DESeq (version 1.8.3). |

For manuscripts utilizing custom algorithms or software that are central to the research but not yet described in published literature, software must be made available to editors and reviewers. We strongly encourage code deposition in a community repository (e.g. GitHub). See the Nature Portfolio [guidelines for submitting code & software](#) for further information.

### Data

Policy information about [availability of data](#)

All manuscripts must include a [data availability statement](#). This statement should provide the following information, where applicable:

- Accession codes, unique identifiers, or web links for publicly available datasets
- A description of any restrictions on data availability
- For clinical datasets or third party data, please ensure that the statement adheres to our [policy](#)

The raw metabolomics and RNA-seq data files generated in this study have been deposited in the National Omics Data Encyclopedia under accession code OEP002699 [<https://www.biosino.org/node/project/detail/OEP002699>]. The RNA-seq data files generated in this study have been deposited in the Gene Expression

Omnibus database under accession code GSE204740 [https://www.ncbi.nlm.nih.gov/geo/query/acc.cgi?acc=GSE204740]. Sequencing reads were mapped to the *Drosophila Melanogaster* reference genome dm6 [https://www.genome.ucsc.edu/cgi-bin/hgGateway?db=dm6]. The annotation results for all metabolomics datasets are provided in the Supplementary Data 1-3. Source data are provided with this paper.

## Field-specific reporting

Please select the one below that is the best fit for your research. If you are not sure, read the appropriate sections before making your selection.

Life sciences  Behavioural & social sciences  Ecological, evolutionary & environmental sciences

For a reference copy of the document with all sections, see [nature.com/documents/nr-reporting-summary-flat.pdf](https://www.nature.com/documents/nr-reporting-summary-flat.pdf)

## Life sciences study design

All studies must disclose on these points even when the disclosure is negative.

|                 |                                                                                                                                                                                                                                                                                                                                                                                                                                                                                                                                                                                                                                  |
|-----------------|----------------------------------------------------------------------------------------------------------------------------------------------------------------------------------------------------------------------------------------------------------------------------------------------------------------------------------------------------------------------------------------------------------------------------------------------------------------------------------------------------------------------------------------------------------------------------------------------------------------------------------|
| Sample size     | The experiment of 293T cell in Figure 1 was performed with three biological independent samples. The experiment in Figure 1 for reproducibility evaluation was performed with 6 technical replicates. The experiments of aging <i>Drosophila</i> were performed with ten biologically independent samples for each group. The experiments of PRC2 mutant <i>Drosophila</i> were performed with eight biologically independent samples for each group. No sample-size calculation was performed here. The sample sizes were chosen because they are the commonly used number for most biological studies in metabolomics society. |
| Data exclusions | No samples were excluded from analysis in this study.                                                                                                                                                                                                                                                                                                                                                                                                                                                                                                                                                                            |
| Replication     | The 293T cell samples (n=3 biologically independent samples) were used for data analysis in Figure 1. The pooled 293T cell samples (n=6 replicated samples) were used for reproducibility evaluation in Figure 1. The <i>Drosophila</i> head tissue (n=10 biologically independent samples) and <i>Drosophila</i> muscle tissue (n=10 biologically independent samples) were used for data analysis in Figure 2-5. The PRC2 mutant <i>Drosophila</i> head tissue (n=8 biologically independent samples) were used for data analysis in Figure 5. Each sample was analyzed once by LC-MS.                                         |
| Randomization   | For all datasets, samples were assigned randomly to acquire LC-MS data.                                                                                                                                                                                                                                                                                                                                                                                                                                                                                                                                                          |
| Blinding        | The investigators were blinded to group allocation during data collection. At the time of sample acquisition and processing, scientists were completely unaware of the sample group. The data analyses were blinded.                                                                                                                                                                                                                                                                                                                                                                                                             |

## Reporting for specific materials, systems and methods

We require information from authors about some types of materials, experimental systems and methods used in many studies. Here, indicate whether each material, system or method listed is relevant to your study. If you are not sure if a list item applies to your research, read the appropriate section before selecting a response.

### Materials & experimental systems

|                                     |                                                                 |
|-------------------------------------|-----------------------------------------------------------------|
| n/a                                 | Involvement in the study                                        |
| <input checked="" type="checkbox"/> | <input type="checkbox"/> Antibodies                             |
| <input type="checkbox"/>            | <input checked="" type="checkbox"/> Eukaryotic cell lines       |
| <input checked="" type="checkbox"/> | <input type="checkbox"/> Palaeontology and archaeology          |
| <input type="checkbox"/>            | <input checked="" type="checkbox"/> Animals and other organisms |
| <input checked="" type="checkbox"/> | <input type="checkbox"/> Human research participants            |
| <input checked="" type="checkbox"/> | <input type="checkbox"/> Clinical data                          |
| <input checked="" type="checkbox"/> | <input type="checkbox"/> Dual use research of concern           |

### Methods

|                                     |                                                 |
|-------------------------------------|-------------------------------------------------|
| n/a                                 | Involvement in the study                        |
| <input checked="" type="checkbox"/> | <input type="checkbox"/> ChIP-seq               |
| <input checked="" type="checkbox"/> | <input type="checkbox"/> Flow cytometry         |
| <input checked="" type="checkbox"/> | <input type="checkbox"/> MRI-based neuroimaging |

## Eukaryotic cell lines

Policy information about [cell lines](#)

|                                                                   |                                                                                                                                          |
|-------------------------------------------------------------------|------------------------------------------------------------------------------------------------------------------------------------------|
| Cell line source(s)                                               | HEK293T (CRL-2925, ATCC)                                                                                                                 |
| Authentication                                                    | None of the cell lines used were authenticated.                                                                                          |
| Mycoplasma contamination                                          | The cell lines were routinely tested for mycoplasma contamination. The cell lines used are free of mycoplasma but not described in text. |
| Commonly misidentified lines (See <a href="#">ICLAC</a> register) | No Commonly misidentified lines were used.                                                                                               |

## Animals and other organisms

---

Policy information about [studies involving animals](#); [ARRIVE guidelines](#) recommended for reporting animal research

|                         |                                                                                                                                                          |
|-------------------------|----------------------------------------------------------------------------------------------------------------------------------------------------------|
| Laboratory animals      | Wild type male fruit flies with age 3d and 30d (FlyBase ID: FBst0005905). PRC2 mutant (Pcl c421/+; Su(z)12 c253/+) male fruit flies with age 8d and 30d. |
| Wild animals            | The study did not involve any wild animals.                                                                                                              |
| Field-collected samples | The study did not involve animals collected from the field.                                                                                              |
| Ethics oversight        | The study did not need ethic oversight.                                                                                                                  |

Note that full information on the approval of the study protocol must also be provided in the manuscript.
